# Supplementary material
Source: Springer Nature journal article supplement (https://www.springermedizin.de/resource/supplementary/12959_2013_181_MOESM1_ESM.pdf/9569266)

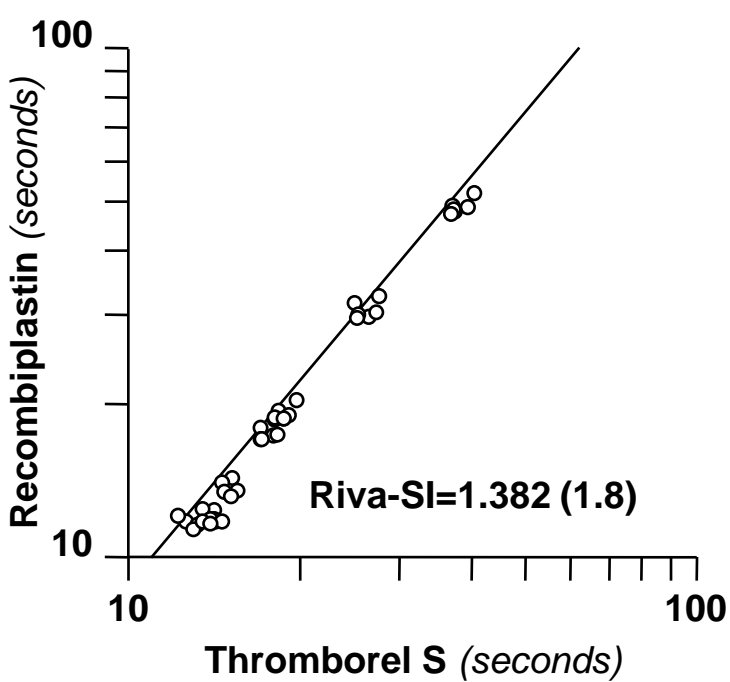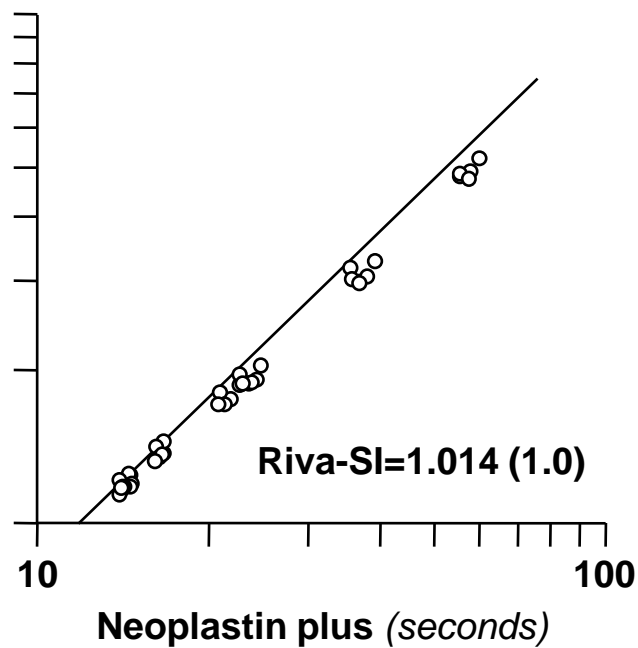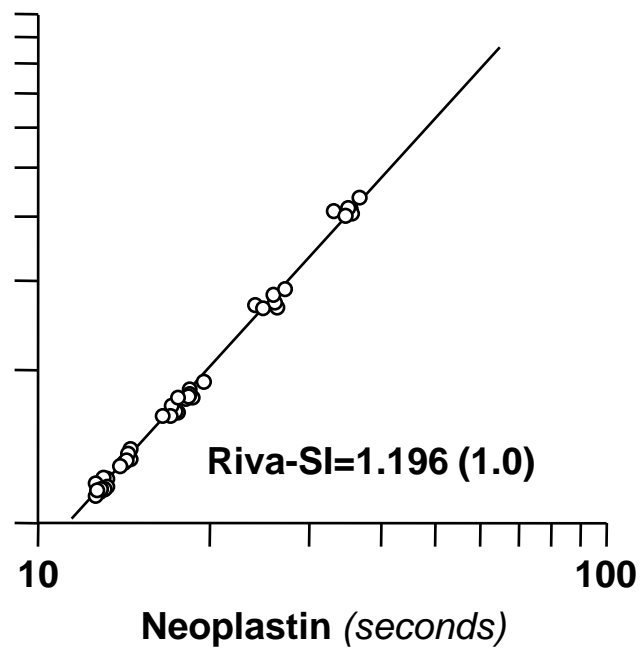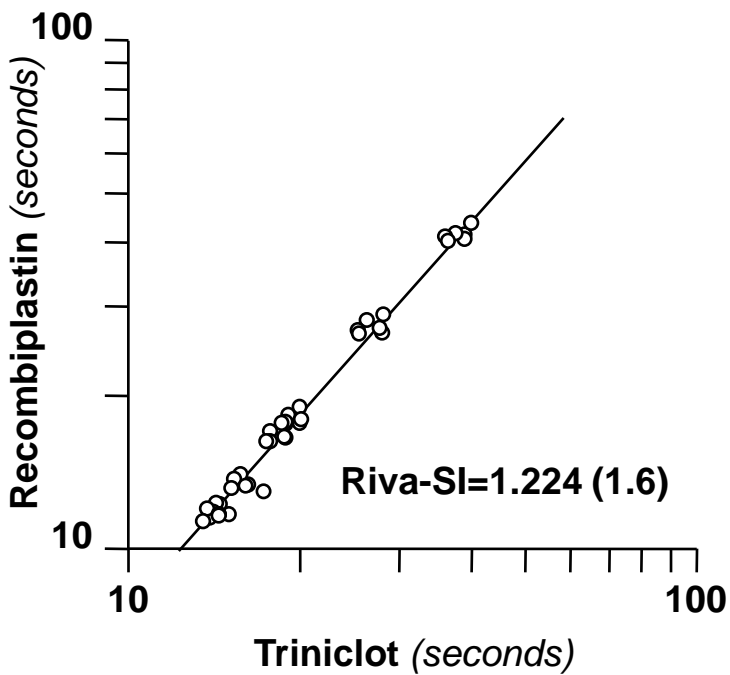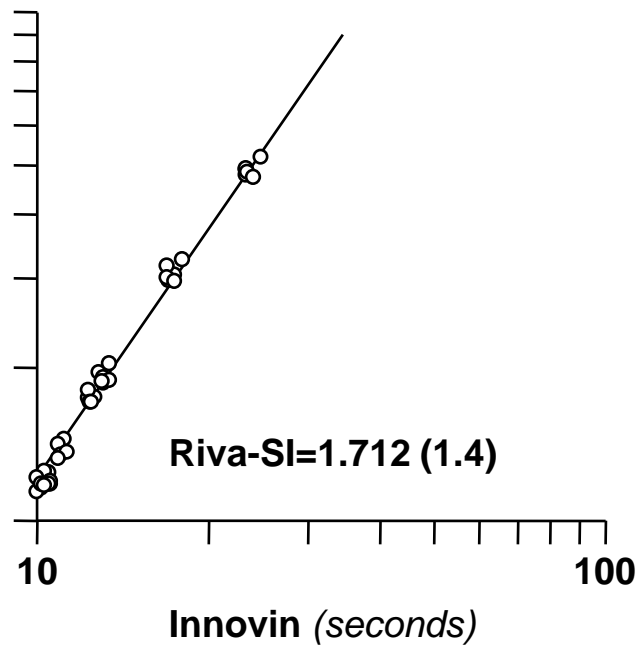

Supplement: MOESM1 [file 9569266]
